# Supplementary material
Source: Elsevier journal article supplement (https://www.sciencedirect.com/science/article/pii/S087025512100322X)
Supplement: mmc1 [file S087025512100322X:mmc1.doc]

# Supplementary material

The following criteria were uniformly used to define the main clinical indications for invasive coronary angiography:

(i) Stable coronary artery disease (CAD): patients undergoing invasive coronary angiography (ICA) for suspected CAD due to symptoms, silent ischemia on non-invasive testing, or documentation by computed tomography of coronary atherosclerosis deemed to be significant by the referring physicians.

(ii) Ongoing acute coronary syndrome (ACS): patients with ST-elevation myocardial infarction (STEMI) undergoing primary or rescue PCI, non-ST-elevation myocardial infarction, or unstable angina within 72 hours of symptom onset.

(iii) Recent ACS: patients undergoing ICA >72 hours after symptom onset or deferred procedures either after an initial primary PCI for STEMI or secondary revascularization after an initial procedure in the setting of non-ST elevation ACS, provided it was undertaken within three days of the index event.

(iv) Valve disease: procedures before planned valve intervention or surgery.

(v) Miscellaneous: patients who do not fulfill any of the above criteria (for example investigation of left ventricular dysfunction or ventricular arrhythmia without confirmed CAD, or patients undergoing cardiac surgery for non-valvular disease).

(vi) Not reported: cases in which there was no mention of the indication for the procedure.


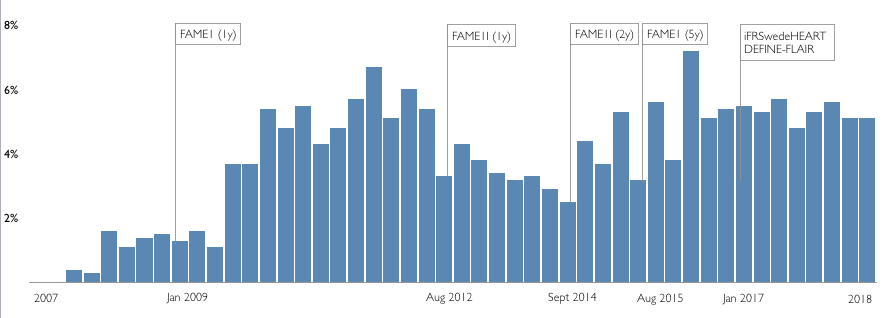


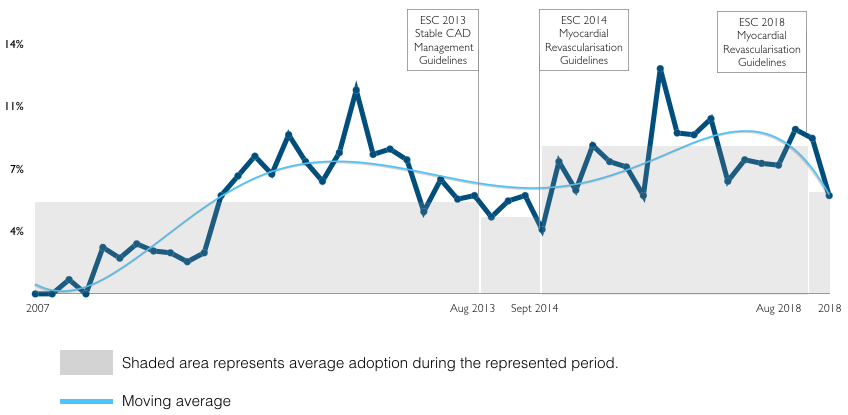


**[label top panel as** A **and bottom panel as** B**]**

**[change** Sept 2014 **to** **Sep** 2014 **in both cases]**

**[change** 1y **to** 1 year**,** 2y **to** 2 years**, and** 5y **to** 5 years**, all with space]**

**[change top labels in panel B to** 2013 European stable CAD management guidelines**,** 2014 European myocardial revascularization guidelines**, and** 2018 European myocardial revascularization guidelines**]**

**[change** Shaded area represents average adoption during the represented period **to** Shaded area represents average adoption during the study period**, i.e. change** represented **to** study**]**

**Supplementary Figure S1** (A) Trends in the overall adoption of physiological assessment, represented by year-quarters (vertical columns) over the study period (2007 to 2018), and their association with the publication dates of major clinical trial reports; (B) trends in the adoption of invasive physiological assessment in patients undergoing invasive coronary angiography (including diagnostic procedures and percutaneous coronary intervention) in the setting of stable coronary artery disease (CAD) and their relationship with the publication dates of European guidelines on the management of stable CAD (2013) and on myocardial revascularization (2014 and 2018).


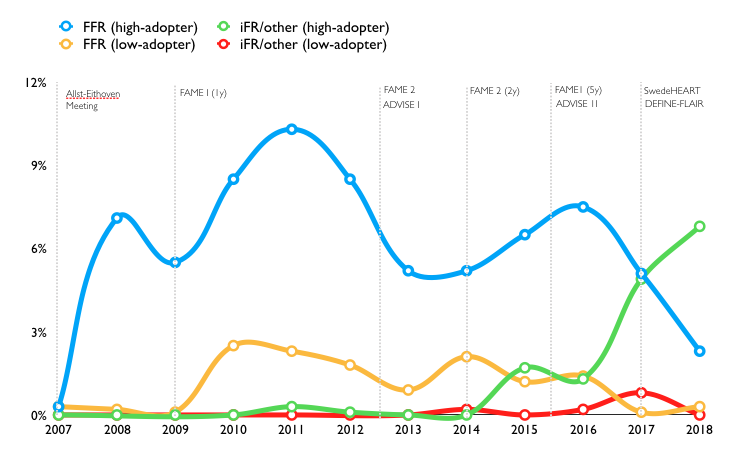


**[change** Allst-Eithoven Meeting **to** Aalst-Eindhoven meeting**]**

**[change** high-adopter **to** high adopter **and** low-adopter **to** low adopter**, i.e. delete hyphens]**

**[change** 1y **to** 1 year**,** 2y **to** 2 years**, and** 5y **to** 5 years**, all with space]**

**Supplementary Figure S2** Trends in the use of physiological assessment in high and low adopters, according to relevant scientific landmarks.


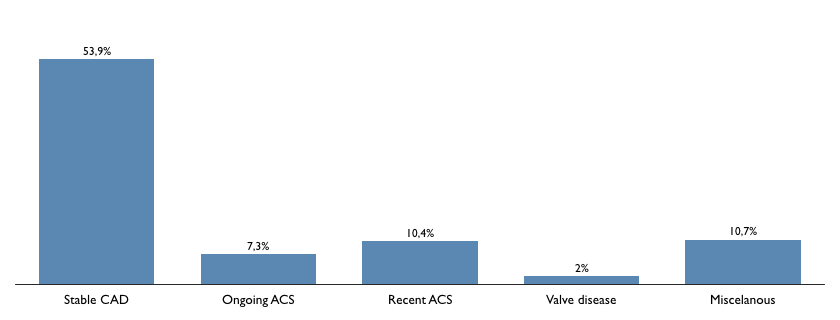


**[change all decimal commas to points]**

**[change** Miscelanous **to** Miscellaneous**]**

**Supplementary Figure S3** Availability of any non-invasive testing at baseline, according to study-defined clinical indications for invasive coronary angiography. ACS: acute coronary syndrome; CAD: coronary artery disease.


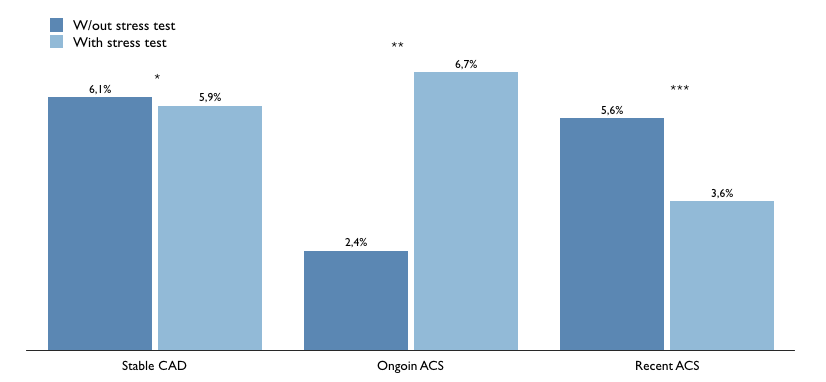


**[change** W/out **to** Without **and** Ongoin ACS **to** Ongoing ACS**]**

**[change all decimal commas to points]**

**Supplementary Figure S4** Adoption of invasive physiology according to the use of any functional stress test prior to invasive coronary angiography in the main clinical settings.

*p=0.446; **p<0.001; ***p=0.121; p-values are for the chi-square distribution between groups within each clinical setting.


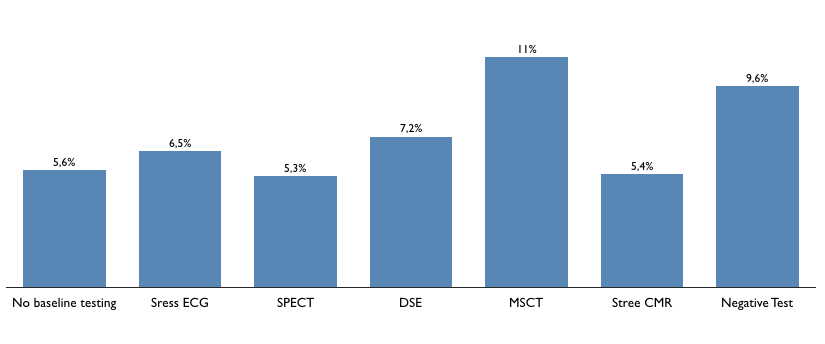


**[change all decimal commas to points]**

**[change** Sress ECG **to** Stress ECG**,** Stree CMR **to** Stress CMR**, and** Negative Test **to** Negative test**, i.e. lower-case t]**

**Supplementary Figure S5** Adoption of invasive physiology according to baseline testing and testing modality in patients undergoing invasive coronary angiography in the setting of stable coronary artery disease. CMR: cardiac magnetic resonance; DSE: dobutamine stress echocardiography; ECG: electrocardiography; MSCT: multislice computed tomography; SPECT: single-photon emission computed tomography.


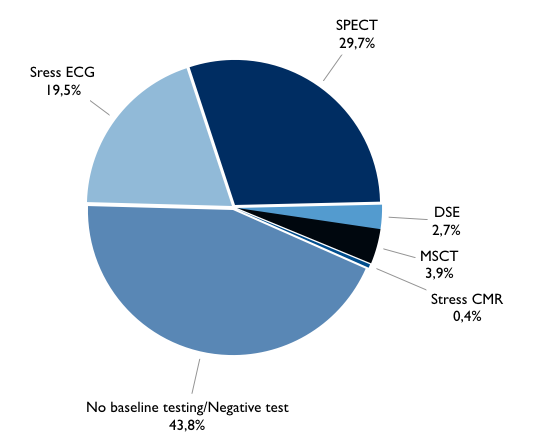


**[change all decimal commas to points]**

**[change** Sress ECG **to** Stress ECG **and** No baseline testing/Negative test **to** No baseline testing/negative test**, i.e. lower-case n]**

**Supplementary Figure S6** Distribution of non-invasive testing modalities among patients with stable coronary artery disease in whom percutaneous coronary intervention was decided and attempted in the index procedure. A negative test refers to any functional test performed prior to the index procures yielding a negative result concerning the presence of signs of inducible ischemia. CMR: cardiac magnetic resonance; DSE: dobutamine stress echocardiography; ECG: electrocardiography; MSCT: multislice computed tomography; SPECT: single-photon emission computed tomography.


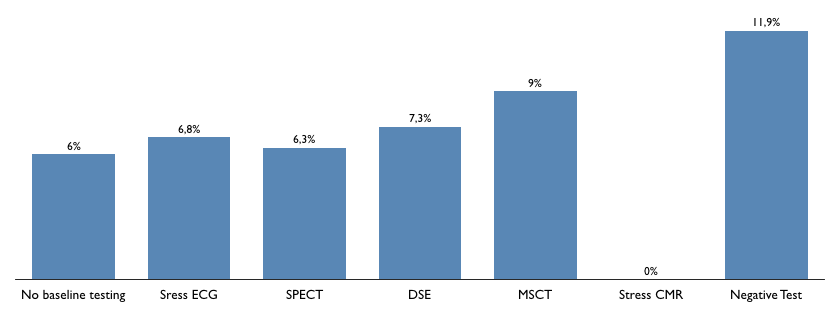


**[change all decimal commas to points]**

**[change** Sress ECG **to** Stress ECG **and** Negative test **to** Negative test**, i.e. lower-case t]**

**Supplementary Figure S7** Prevalence of physiological assessment according to available non-invasive testing modalities among patients with stable coronary artery disease in whom percutaneous coronary intervention was decided and attempted in the index procedure. Negative test refers to any functional test that although performed had been reported as negative. CMR: cardiac magnetic resonance; DSE: dobutamine stress echocardiography; ECG: electrocardiography; MSCT: multislice computed tomography; SPECT: single-photon emission computed tomography.


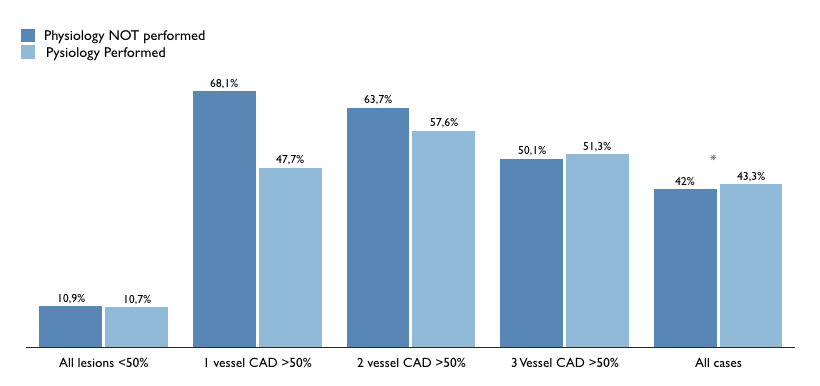


**[change** Physiology NOT performed **to** Physiological assessment not performed**,** Pysiology Performed **to** Physiological assessment performed**,** 1 vessel CAD >50% **to** 1-vessel >50% stenosis**,** 2 vessel CAD >50% **to** 2-vessel >50% stenosis**, and** 3 Vessel CAD >50% **to** 3-vessel >50% stenosis**]**

**[change all decimal commas to points]**

**Supplementary Figure S8** Proportion of percutaneous coronary interventions according to the severity and extent of coronary artery disease (horizontal axis), comparing procedures in which physiological assessment was used (light blue columns) with those in which it was not (dark blue columns).

*p=0.30 (chi-square distribution between groups).


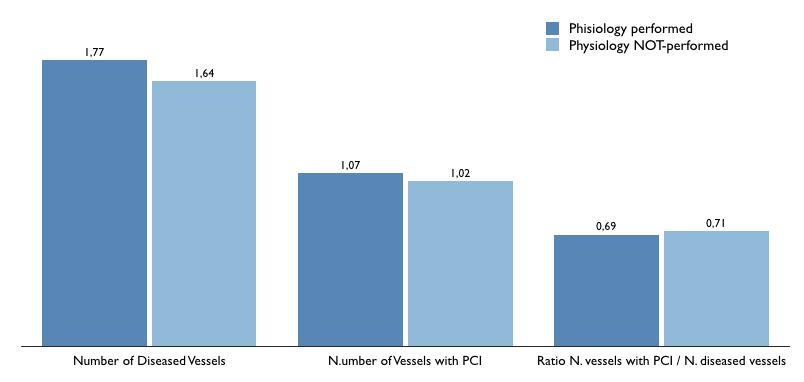


**[change** Physiology NOT-performed **to** Physiological assessment not performed **and** Phisiology performed **to** Physiological assessment performed**]**

**[change all decimal commas to points]**

**[change bottom legends to** No. of diseased vessels**,** No. of vessels treated by PCI**, and** Ratio of no. of vessels treated by PCI to no. of diseased vessels]

**Supplementary Figure S9** Comparison of coronary artery disease burden (represented as the mean number of vessels with >50% stenosis) and PCI extent (mean number of vessels treated by PCI) according to the use of invasive physiology. PCI: percutaneous coronary intervention.


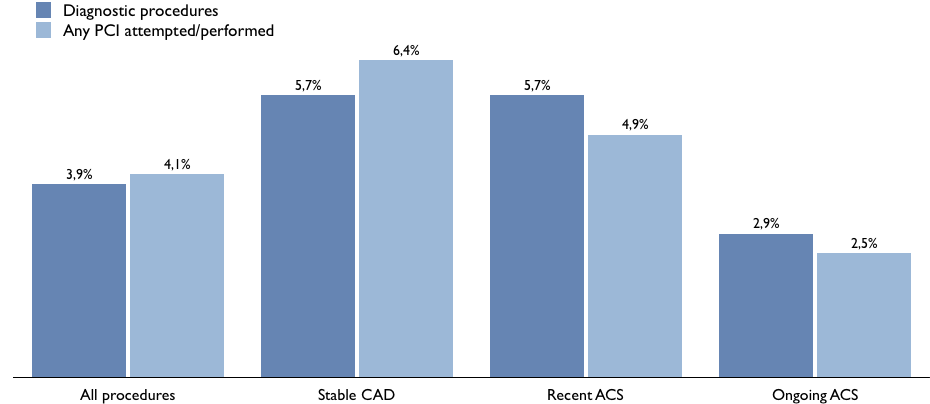


**[change all decimal commas to points]**

**Supplementary Figure S10** Adoption of physiological assessment according to type of procedure (diagnostic only vs. interventional) overall and in the main clinical settings. ACS: acute coronary syndrome; CAD: coronary artery disease; PCI: percutaneous coronary intervention.
